# Supplementary material
Source: publisher figshare collection journal article supplement (https://gsajournals.figshare.com/ndownloader/files/26176901)
Supplement: Supplementary file 1 [file 26176901]

## Sheet: ColumnConditionNamesAndCategori
Table 6: Heatmap column conditions and categories
Column Condition (in order from left to right on heatmaps [top to bottom in this table])	Category
SRR585661.Perithecia0hN6MTP.single	Development
SRR585669.Perithecia0hN6.single	Development
SRR585662.Perithecia2hN6MTP.single	Development
SRR585670.Perithecia2hN6.single	Development
SRR585663.Perithecia24hN6MTP.single	Development
SRR585671.Perithecia24hN6.single	Development
SRR585664.Perithecia48hN6MTP.single	Development
SRR585672.Perithecia48hN6.single	Development
SRR585665.Perithecia72hN6MTP.single	Development
SRR585673.Perithecia72hN6.single	Development
DPF3.dpfperithecia.MERGED.paired	Development
SRR585666.Perithecia96hN6MTP.single	Development
SRR585674.Perithecia96hN6.single	Development
DPF4.dpfperithecia.MERGED.paired	Development
SRR585667.Perithecia120hN6MTP.single	Development
SRR585675.Perithecia120hN6.single	Development
DPF5.dpfperithecia.MERGED.paired	Development
SRR585668.Perithecia144hN6MTP.single	Development
SRR585676.Perithecia144hN6.single	Development
DPF6.dpfperithecia.MERGED.paired	Development
Darkonly.MERGED.single	Light Response
SRR1025975.constantlight6h.DMSOf1h.single	Light Response
SRR1025976.constantlight6h.staurosporine1h.single	Light Response
Light15minlight.MERGED.single	Light Response
Light60minlight.MERGED.single	Light Response
Light120minlight.MERGED.single	Light Response
Light240minlight.MERGED.single	Light Response
SRR7082724.Constantlight6h.11hlightdarkcycles.Constantdark0h.single	Light Response
SRR7082725.Constantlight6h.11hlightdarkcycles.Constantdark2h.single	Light Response
SRR7082726.Constantlight6h.11hlightdarkcycles.Constantdark4h.single	Light Response
SRR7082727.Constantlight6h.11hlightdarkcycles.Constantdark6h.single	Light Response
SRR7082728.Constantlight6h.11hlightdarkcycles.Constantdark8h.single	Light Response
SRR7082729.Constantlight6h.11hlightdarkcycles.Constantdark10h.single	Light Response
SRR7082730.Constantlight6h.11hlightdarkcycles.Constantdark12h.single	Light Response
SRR7082731.Constantlight6h.11hlightdarkcycles.Constantdark14h.single	Light Response
SRR7082732.Constantlight6h.11hlightdarkcycles.Constantdark16h.single	Light Response
SRR7082733.Constantlight6h.11hlightdarkcycles.Constantdark18h.single	Light Response
SRR7082734.Constantlight6h.11hlightdarkcycles.Constantdark20h.single	Light Response
SRR7082735.Constantlight6h.11hlightdarkcycles.Constantdark22h.single	Light Response
Constantlightfor24h.Constantdarkfor24h.30minofconstantlight.MERGED.paired	Light Response
growninconstantlightfor24h.transferredtoconstantdarkfor24h.MERGED.paired	Light Response
standardconditions.MERGED.single	Metabolism
sucrose1h.MERGED.single	Metabolism
sucrose4h.MERGED.single	Metabolism
vegetativehypha.MERGED.paired	Metabolism
VMM16hVMMXylan4h.MERGED.single	Metabolism
Pi5hgerm10mMPi.MERGED.paired	Metabolism
Pi5hgerm10uMPi.MERGED.paired	Metabolism
Sucrose4h.MERGED.single	Metabolism
BSANoVogelsNoCarbon.MERGED.single	Metabolism
GroundmiscanthusNoVogels.MERGED.single	Metabolism
pectin.MERGED.single	Metabolism
xylan.MERGED.single	Metabolism
Avicel4h.MERGED.single	Metabolism
NoCarbon4h.MERGED.single	Metabolism
OrangePeelPowder4h.MERGED.single	Metabolism
Pectin4h.MERGED.single	Metabolism
Sucrose4h.MERGED.single.1	Metabolism
avicel4h.MERGED.single	Metabolism
Avicel1h.MERGED.single	Metabolism
Avicel4h.MERGED.single.1	Metabolism
Bird120minpolargrowth.MERGED.paired	Metabolism
Bird15minfreshconidia.MERGED.paired	Metabolism
Bird240mindoublingoflongaxis.MERGED.paired	Metabolism
Bird360minfirsthyphalbranching.MERGED.paired	Metabolism
NoIron.MERGED.single	Metabolism
MapleSap120minpolargrowth.MERGED.paired	Metabolism
MapleSap15minfreshconidia.MERGED.paired	Metabolism
MapleSap240mindoublingoflongaxis.MERGED.paired	Metabolism
MapleSap360minfirsthyphalbranching.MERGED.paired	Metabolism
Avicel.MERGED.single	Metabolism
NoCarbon.MERGED.single	Metabolism
NoCarbon4h.MERGED.single.1	Metabolism
NoCarbon4h.MERGED.single.2	Metabolism
SRR1562549.BarleyStraw30h.single	Metabolism
SRR1562550.CornStraw30h.single	Metabolism
SRR1562551.RiceStraw30h.single	Metabolism
SRR1562552.SoybeanStraw30h.single	Metabolism
SRR1562553.WheatStraw30h.single	Metabolism
SRR1562554.Sucrose16h.single	Metabolism
SRR1593998.VMMavicel36h.H2O1h.single	Metabolism
SRR1594000.VMMAvicel36h.DTT5mM1h.single	Metabolism
SRR1594003.VMM16h.Avicel4h.H2O1h.single	Metabolism
SRR1594004.VMM16h.Avicel4h.DTT5mM1h.single	Metabolism
SRR1594011.VMMAviceltx36h.H2O1h.paired	Metabolism
SRR1594012.VMMavicel36h.DTT5mM1h.paired	Metabolism
SRR2952639.VMM8h.single	Metabolism
SRR2952640.VMM16h.single	Metabolism
SRR2952641.VMM4h.single	Metabolism
SRR2952642.VMMChitosan4h.single	Metabolism
SRR2952643.VMMChitosan8h.single	Metabolism
SRR2952644.VMMChitosan16h.single	Metabolism
SRR400646.Avicel2h.single	Metabolism
SRR400647.Avicel30min.single	Metabolism
SRR400651.Nocarbon1h.rep3.single	Metabolism
SRR447473.Cellobiose4h.single	Metabolism
SRR627939.WTXylan4h.single	Metabolism
